# Supplementary material
Source: PubMed Central journal article supplement (PMC3412945)
Supplement: NIHMS377784-supplement-ESM.pdf [file NIHMS377784-supplement-ESM.pdf]

## ESM methods

**Materials.** Tunicamycin (TM) and thapsigargin (TG) were purchased from Sigma-aldrich (St. Louis, MO). Tauroursodeoxycholic acid (TUDCA), 4-Phenylbutyrate (PBA) and Cucurbitacin I were obtained from EMD Chemicals (Gibbstown, NJ, USA). Antibodies against ICAM-1, TNF- $\alpha$ , VEGF, ATF4 and C/EBP homologous protein (CHOP) were purchased from Santa Cruz Biotechnology (Santa Cruz, CA, USA). Antibodies against phosphorylated and total RNA-dependent protein kinase-like ER kinase (PERK), eukaryotic translation initiation factor-2 $\alpha$  (eIF-2 $\alpha$ ) and STAT3 were obtained from Cell signaling Technology (Boston, MA, USA). Anti-GRP78 and anti- $\beta$ -actin antibodies were obtained from Abcam Inc. (Cambridge, MA, USA). FITC-conjugated or HRP-conjugated secondary antibodies, and DAPI were purchased from Jackson ImmunoResearch Laboratories (West Grove, PA, USA) and Vector laboratories (Bulingame, CA, USA), respectively.

**Quantification of BRB breakdown.** Mice were deeply anesthetized and injected intraventricularly FITC-conjugated dextran (4.4 kDa, Sigma) at 50 mg/kg BW. After 15 minutes, the chest cavity was opened and a 31-gauge cannula was introduced into the aorta. A blood sample was collected, and the vessels were perfused with PBS (500 ml/kg BW). Immediately after perfusion, retinas were carefully dissected, weighed, and homogenized in 150 $\mu$ l of diH<sub>2</sub>O. FITC-dextran in the retinal homogenate was extracted by centrifugation at 7,000 rpm for 90mins at 4°C through a 30,000 molecular weight filter (Millipore, Bedford, MA, USA). Blood samples were centrifuged at 7,000 rpm for 20 minutes at 4°C, and the supernatant was diluted at 1:100 with diH<sub>2</sub>O. Fluorescence in retina and plasma samples was measured using spectrofluorometer with excitation of 485 nm and emission of 538 nm and calculated according to a standard curve. BRB breakdown was quantified using the following equation:

$$\frac{\text{Retinal FITC-dextran } (\mu\text{g})/\text{retinal weight (g)}}{\text{Plasma FITC-dextran concentration } (\mu\text{g}/\mu\text{L}) \times \text{circulation time (h)}}$$

**ESM Table 1. Sequences of primers used in real-time RT-PCR.**

| Gene          | forward                 | reverse                  |
|---------------|-------------------------|--------------------------|
| ICAM-1        | TGCGTTTTGGAGCTAGCGGACCA | CGAGGACCATACAGCACGTGCCAG |
| TNF- $\alpha$ | CGGTGCCTATGTCTCAGCCT    | TTGGGCAGATTGACCTCAGC     |
| CHOP          | GTCCTAGCTTGGCTGACAGA    | TGGAGAGCGAGGGCTTTG       |
| ATF4          | CCCCCTTCGACCAGTCGGGT    | CCGCCTTGTCGCTGGAGAACC    |

# ESM Figure 1

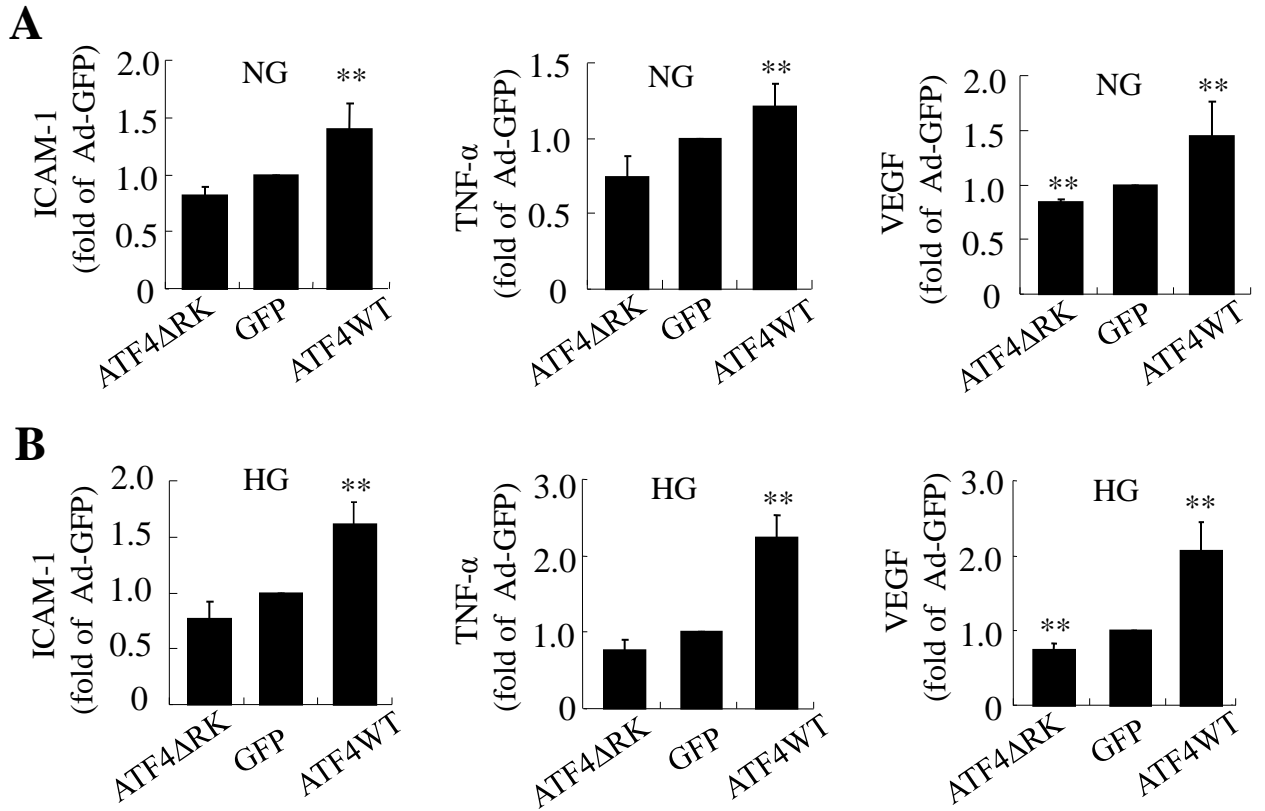

**Densitometric quantification of Western blots in Figure 7B.** Results were expressed as mean  $\pm$  SD, n=3. \*\*p<0.01 vs. GFP. NG: normal glucose (5 mmol/l); HG: high glucose (25 mmol/l).
